# Supplementary material for: Evidence That Sleep Is an Indicator of Overtraining during the Competition Phase of Adolescent Sprinters
Source: J Sports Med (Hindawi Publ Corp). 2021 Apr 3;2021:6694547. doi: 10.1155/2021/6694547 (PMC8041504; doi:10.1155/2021/6694547)
Supplement: Supplementary Materials — Table S1: performance data for each sprinter across the competitive phase of the athletic season. Table S2: the biochemical response of sprinters corresponding to different phases of the athletic season. [file 6694547.f1.zip]

Archive with 2 entries (2 files):
- 6694547.f1/Supplementaeary Table 2 (1).docx
- 6694547.f1/Supplimentary Table 1 (1).docx
